# Supplementary material for: Fabrication and optical properties of garnet ceramics based on Y3−xScxAl5O12 doped with ytterbium and erbium
Source: Royal Society of Chemistry journal article supplement (doi:10.1039/d3dt01453c), 2023-01-01
Supplement: d3dt01453c1.pdf [file d3dt01453c1.pdf]

Table S1. Initial data for full-profile analysis using HighScore Plus v.3.0.5 software.

| Cation      | Wyckoff | Coordinates |       |       | Sof (AP-01) | Sof (AP-02) | Sof (AP-03) |
|-------------|---------|-------------|-------|-------|-------------|-------------|-------------|
|             |         | x           | y     | z     |             |             |             |
| $Yb^{3+}_C$ | 24c     | 0.125       | 0     | 0.25  | 0.78        | 0.5533      | 0.32        |
| $Yb^{3+}_C$ | 24c     | 0.125       | 0     | 0.25  | 0.15        | 0.15        | 0.15        |
| $Er^{3+}_C$ | 24c     | 0.125       | 0     | 0.25  | 0.03        | 0.03        | 0.03        |
| $Sc^{3+}_C$ | 24c     | 0.125       | 0     | 0.25  | 0.04        | 0.2667      | 0.5         |
| $Sc^{3+}_A$ | 16a     | 0           | 0     | 0     | 0.04        | 0.1         | 0.1         |
| $Al^{3+}_A$ | 16a     | 0           | 0     | 0     | 0.96        | 0.9         | 0.9         |
| $Al^{3+}_D$ | 24d     | 0.375       | 0     | 0.25  | 1           | 1           | 1           |
| $O^{2-}_O$  | 96h     | -0.032      | 0.051 | 0.150 | 1           | 1           | 1           |

Table S2 Refined structural and electronic properties of samples

| Sample      |         | AP-1        | AP-2        | AP-3        |
|-------------|---------|-------------|-------------|-------------|
| space group |         | 1a-3d       | 1a-3d       | 1a-3d       |
| $(a_G)$ , Å |         | 12.00441(6) | 11.95139(5) | 11.87350(6) |
| Coordinates | X (96h) | -0.03009    | -0.02931    | -0.02863    |
|             | y(96h)  | 0.051       | 0.05265     | 0.05281     |
|             | z(96h)  | 0.1495      | 0.15092     | 0.15115     |

Table S3. Agreement Indices

| Agreement Indices |                       | AP-01 | AP-02 | AP-03   |
|-------------------|-----------------------|-------|-------|---------|
|                   | R expected            | 1.759 | 1.88  | 2.10922 |
|                   | R profile             | 2.947 | 3.581 | 3.00029 |
|                   | Weighted R profile    | 3.892 | 5.606 | 4.0155  |
|                   | D-statistics          | 0.422 | 0.39  | 0.47779 |
|                   | Weighted D-statistics | 0.374 | 0.203 | 0.42526 |
|                   | Goodness of Fit       | 4.893 | 8.888 | 3.6244  |
|                   | R Bragg               | 4.07  | 6.61  | 4.53    |
